# Supplementary material for: Melanoma with in-frame deletion of MAP2K1: a distinct molecular subtype of cutaneous melanoma mutually exclusive from BRAF, NRAS, and NF1 mutations
Source: PubMed Central journal article supplement (PMC7685971; doi:10.1038/s41379-020-0581-5), 2020-06-01
Supplement: 41379_2020_581_MOESM1_ESM.pdf [file 41379_2020_581_MOESM1_ESM.pdf]

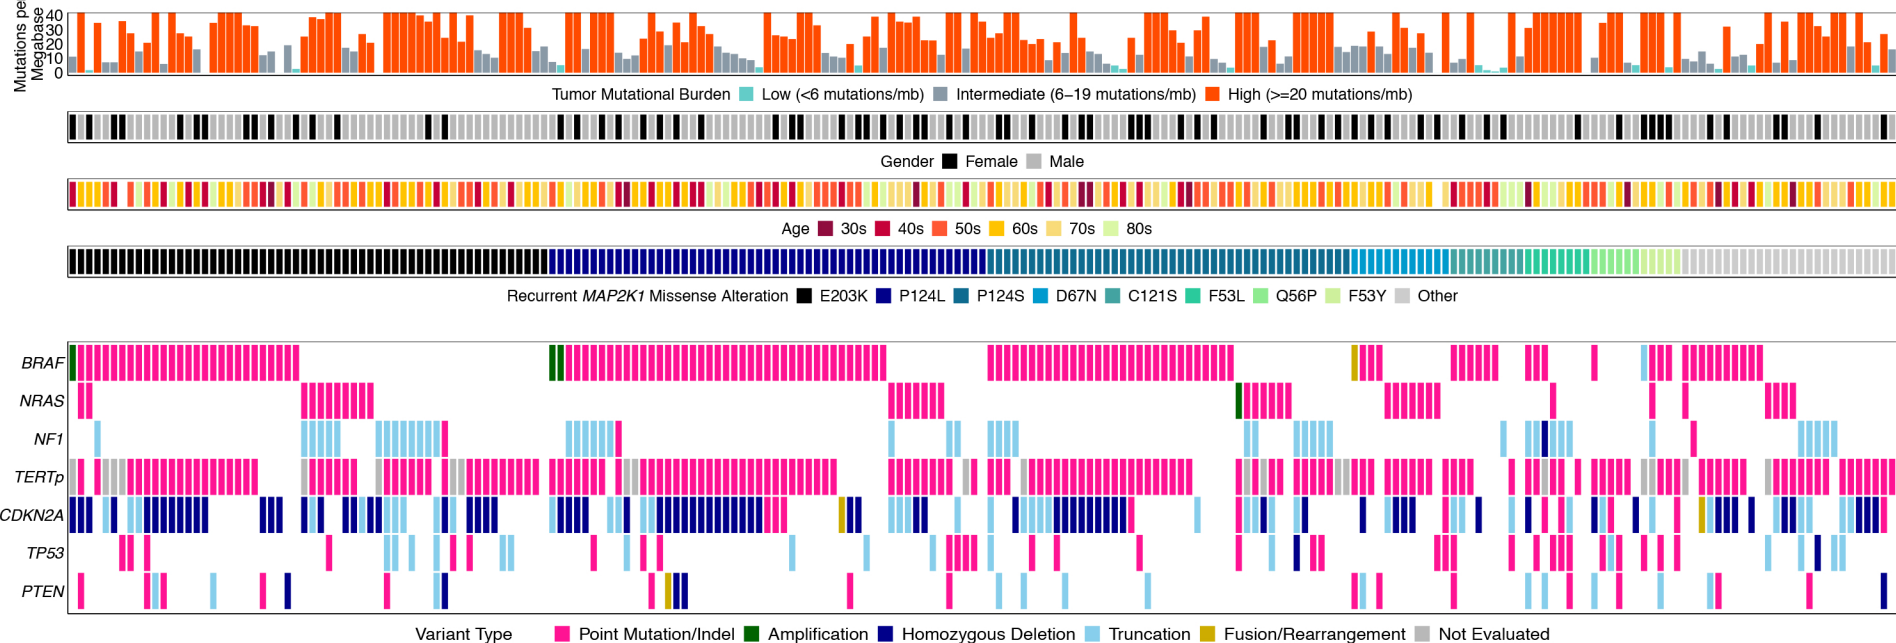

**Supplemental Figure 1.** Summary of clinical features and molecular alterations in melanomas with known and likely pathogenic *MAP2K1* missense mutations.
